# Supplementary material for: Metabolic adaptation drives self-organization during skin organoid morphogenesis
Source: Research Square preprint supplement (doi:10.21203/rs.3.rs-4773919/v1), 2024-08-23
Supplement: Supplementary file 1 [file 2947e3f8cb0f2ca4c21d86db.pdf]

## *Supplementary Information*

### **Metabolic adaptation drives self-organization in skin organoid morphogenesis**

Jingwei Jiang<sup>1</sup>, Weiwei Liu<sup>1</sup>, Mengyue Wang<sup>1</sup>, Dehuan Wang<sup>1</sup>, Wang Wu<sup>1</sup>, Man Zhang<sup>1</sup>, Siyi Zhou<sup>1</sup>, Yang Xiao<sup>1</sup>, Weiyi An<sup>2</sup>, Hengguang Zhao<sup>2</sup>, Rixing Zhan<sup>3</sup>, Li Yang<sup>1</sup>, Gaoxing Luo<sup>3</sup>, Cheng-Ming Chuong<sup>4</sup>, Mingxing Lei<sup>1</sup>

This file includes the following subsections:

- **Extended Data Fig. 1-7**
- **Supplementary Table 1-3**

# Extended Data Fig. 1

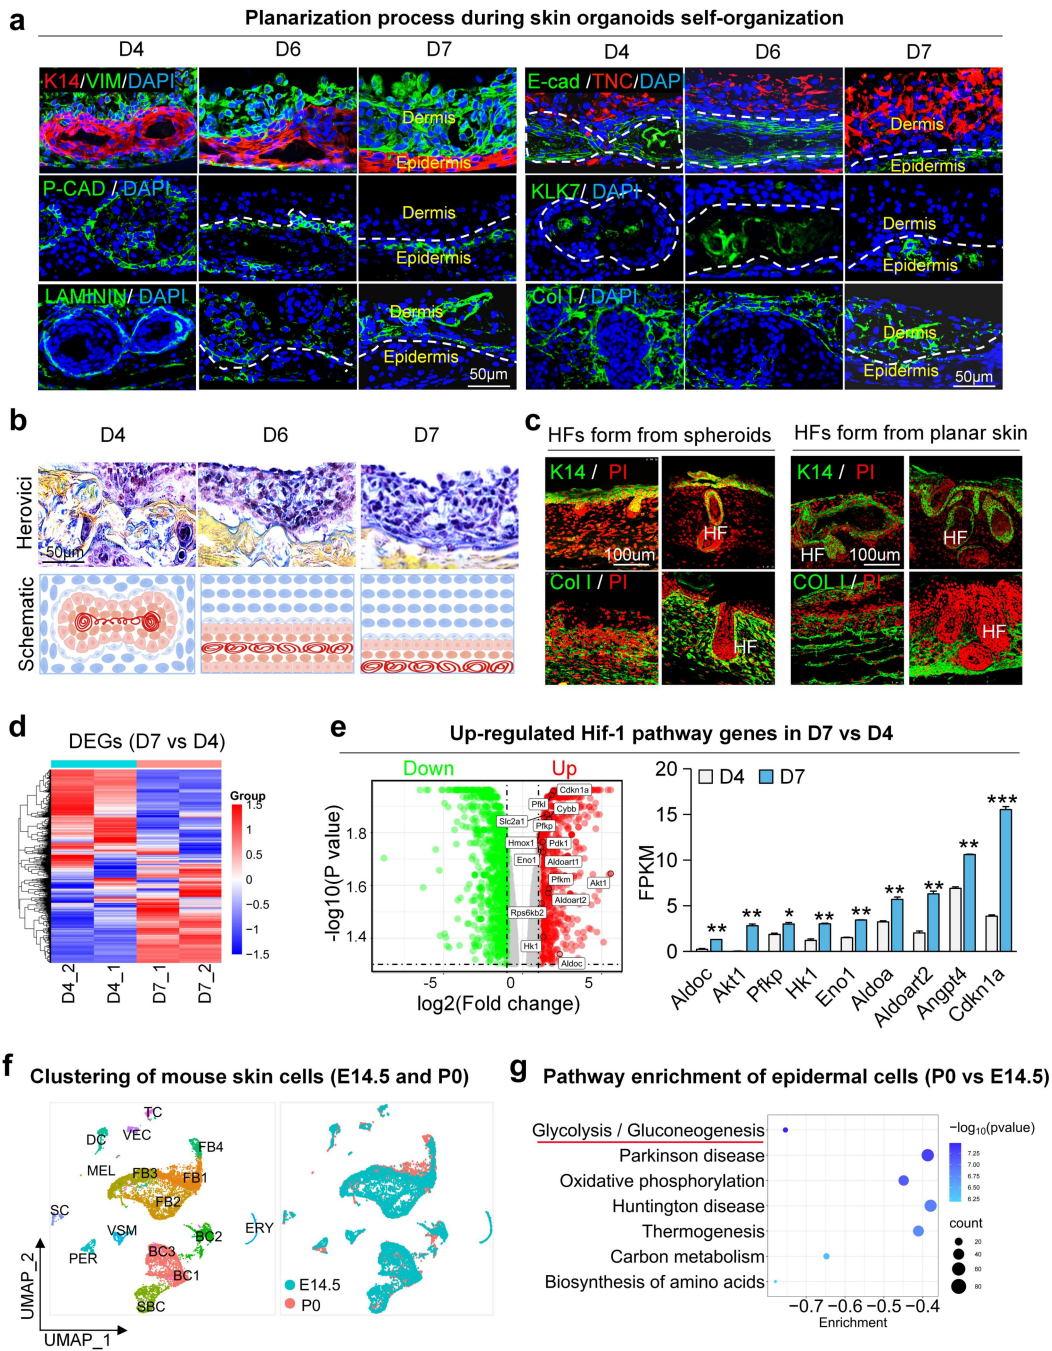

### **Extended Data Fig. 1: Hypoxia adaptation during skin organoid morphogenesis**

- a. Representative immunostaining images to show the transition of skin organoids from coalescence to planarization (D4, D6, D7), as demonstrated by K14 and E-cad for the epidermal cells, Tnc, Vim, and Col I for the pan-fibroblasts, P-cad for the basal cells, Klk7 for the suprabasal cells, Laminin for the basement membrane.
- b. Representative Herovici staining images displaying the dynamic changes of keratin debris and collagen synthesis during self-organization of the skin organoids, newly formed collagen is blue, mature collagen is red, and keratin is yellow. n=3.
- c. Immunofluorescence staining of K14 and Col I reveals the epidermal and dermal structures of cystic hair follicles and planar skin follicles in nude mice after transplantation.
- d. Heatmap displaying the differentially expressed genes (DEGs) between D4 and D7 skin organoids, with 2 replicates per group.
- e. Left: Volcano plot showing the upregulated Hif-1 pathway genes in D7 skin organoids. Right: Bar graph illustrating the upregulated Hif-1 pathway genes in D7 skin organoids, \*\*  $p < 0.01$ , \*\*\* $p < 0.001$ .
- f. UMAP to show the clustering of mouse skin cells (E14.5 and P0).
- g. Bubble plot show the GO enrichment analysis of differentially expressed genes in epidermal cells between P0 skin and E14.5 skin.

## Extended Data Fig. 2

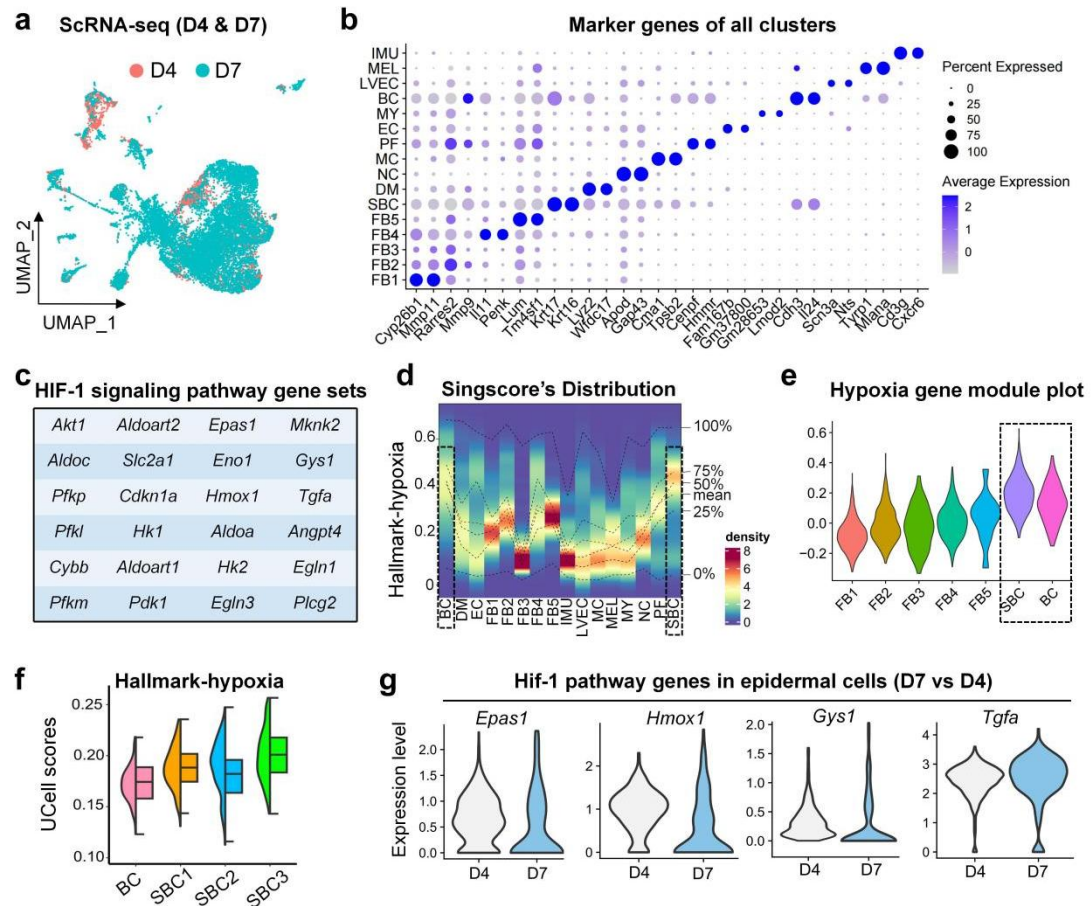

**Extended Data Fig. 2: Multi-omics analyses show cellular and molecular changes during coalescence-planarization transition process**

- a. UMAP plot displaying the dimensionality reduction clustering of D4 and D7 skin organoid samples.
- b. Bubble plot representing the marker genes for each cell cluster in the skin organoids (D4 and D7).
- c. List of Hif-1 pathway genes.
- d. Hif1a scores comparison across all cell clusters.
- e. Violin plot showing the scores of the hypoxia gene module in dermal and epidermal cell clusters
- f. The violin plot compares the hypoxia scores across subclusters of epidermal cells
- g. Violin plots showing the expression differences of Hif-1 pathway genes in D4 and D7 epidermal cells.

Extended Data Fig. 3

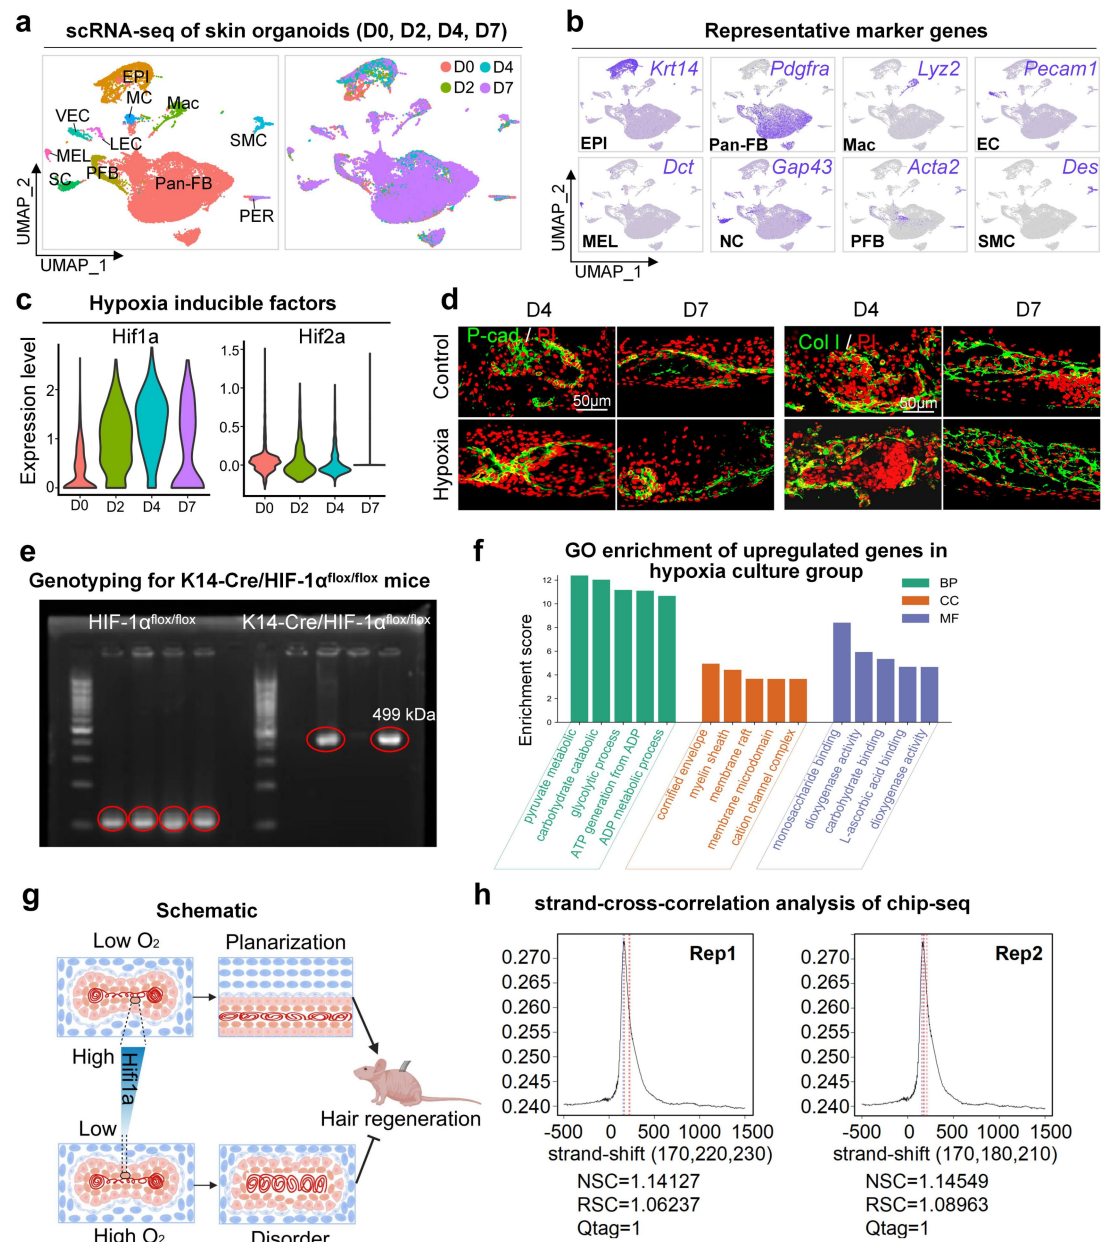

### Extended Data Fig. 3: Hypoxia and Hif1a drive the planar skin formation

- a. UMAP clustering plot showing the integration of skin organoids at D0, D2, D4, and D7 time points with dimensionality reduction.
- b. Featureplot visualization of the expression of representative marker genes.
- c. Violin plots illustrating the expression trends of Hif1a and Epas1 (Hif2a) in the epidermal cell subsets at D0, D2, D4, and D7.
- d. The representative DNA electrophoresis bands illustrate the identification results of *K14<sup>cre</sup>Hif1a<sup>flox/flox</sup>*, with the red circle representing the Cre mouse.
- e. Representative immunofluorescence staining images of Col I and P-cad showing the phenotypic differences between 2% hypoxia culture and 21% normoxia culture of skin organoids.
- f. Bar chart displaying the enrichment of GO terms (BP, CC, and MF) for the upregulated genes in the 2% hypoxia culture.
- g. Schematic diagram showing hypoxia promoting planarization and hair regeneration of the skin organoid.
- h. Pearson cross-correlation analysis of Hif1a ChIP-seq data.



**a** Differential metabolites

**b** VIP score of differential metabolites

**c** Glycolysis gene sets

| Glycolysis gene sets |                |                |               |
|----------------------|----------------|----------------|---------------|
| <i>Akt1</i>          | <i>Aldoat2</i> | <i>Rps6kb2</i> | <i>Mknk2</i>  |
| <i>Aldoc</i>         | <i>Slc2a1</i>  | <i>Eno1</i>    | <i>ErbB2</i>  |
| <i>Cdkn1a</i>        | <i>Pfkfb</i>   | <i>Hmox1</i>   | <i>Trf</i>    |
| <i>Pfkfb</i>         | <i>Hk1</i>     | <i>Aldoa</i>   | <i>Angpt4</i> |
| <i>Cybb</i>          | <i>Aldoat1</i> | <i>Hk2</i>     | <i>Egln1</i>  |
| <i>Pfkfb</i>         | <i>Pdk1</i>    | <i>Egln3</i>   | <i>Plcg2</i>  |

**d** AUCell's Distribution

**e** qRT-PCR of glycolysis genes

**f** Lactate content

**g** Biological process (Hif1a+ vs Hif1a-)

**h** Glycolytic process-involved genes

**i** Glycolysis or gluconeogenesis pathway

**j**



**Extended Data Fig. 4: Glycolytic metabolism facilitates epidermal-dermal phase separation**

- a. Differential metabolite heatmap depicting variations between D4 and D7 skin organoids, with 7 replicates per group.
- b. Bubble plot comparing Variable Importance in Projection (VIP) scores of differential metabolites in D4 and D7 organoids.
- c. AUC gene set used for glycolysis scoring.
- d. Glycolysis scores for all cell subpopulations.
- e. qPCR validation of gene expression changes in glycolysis-related genes during D4 and D7 organoid cultivation.
- f. Quantitative analysis of lactate levels. Left: Differential lactate levels (D7 vs D4) analyzed through metabolomics. Right: Differential lactate levels using a lactate assay kit.
- g. Functional enrichment analysis of upregulated genes in Hif1a-positive cells, focusing on Gene Ontology (GO) biological processes.
- h. Upper: RNA sequencing reveals the expression changes of Pkm, Ldha, Pgk1, and Mif during skin organoid self-organization process. Lower: Co-localization of Pkm, Ldha, Pgk1, and Mif with the epidermis and Hif1a.
- i. Glycolysis and gluconeogenesis pathways, with upregulated genes highlighted in red boxes and metabolites in green circles.
- j. Representative immunofluorescence images of GPI1, LDHA, PGK1, and PFKL during skin organoid self-organization process.

Extended Data Fig. 5

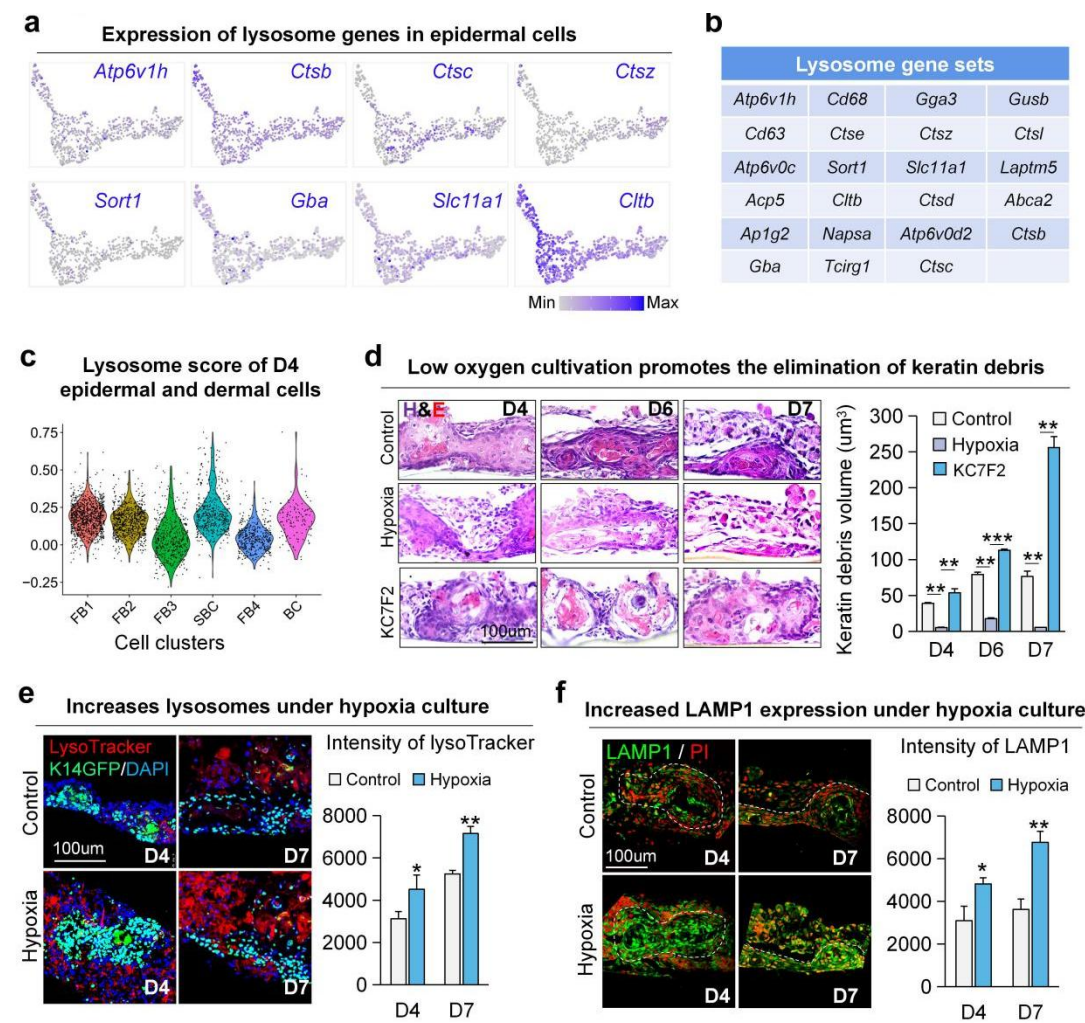

**Extended Data Fig. 5: Hypoxia-driven lysosomal hydrolases clear keratin debris**

- a. UMAP featureplot showing representative expression of lysosomal genes in the epidermal cell population. The lysosome gene set was used for AUC scoring.
- b. Lysosome gene set used for AUC scoring.
- c. Violin plot comparing AUC scores of lysosome genes between dermal and epidermal cell populations.
- d. Left: HE staining images demonstrating the changes in keratin fragments in skin organoids following KCF72 treatment or hypoxic culture. Right: Quantitative analysis of keratin debris levels.
- e. Left: LysosomeTracker staining showing changes in lysosome quantity in skin organoids following hypoxic culture. Right: Quantitative analysis of lysosomal fluorescence intensity.
- f. Changes in expression of the lysosomal membrane protein LAMP1 in skin organoids following hypoxic culture. Left: Immunofluorescence staining. Right: Quantitative analysis of LAMP1 fluorescence intensity.

Extended Data Fig. 6

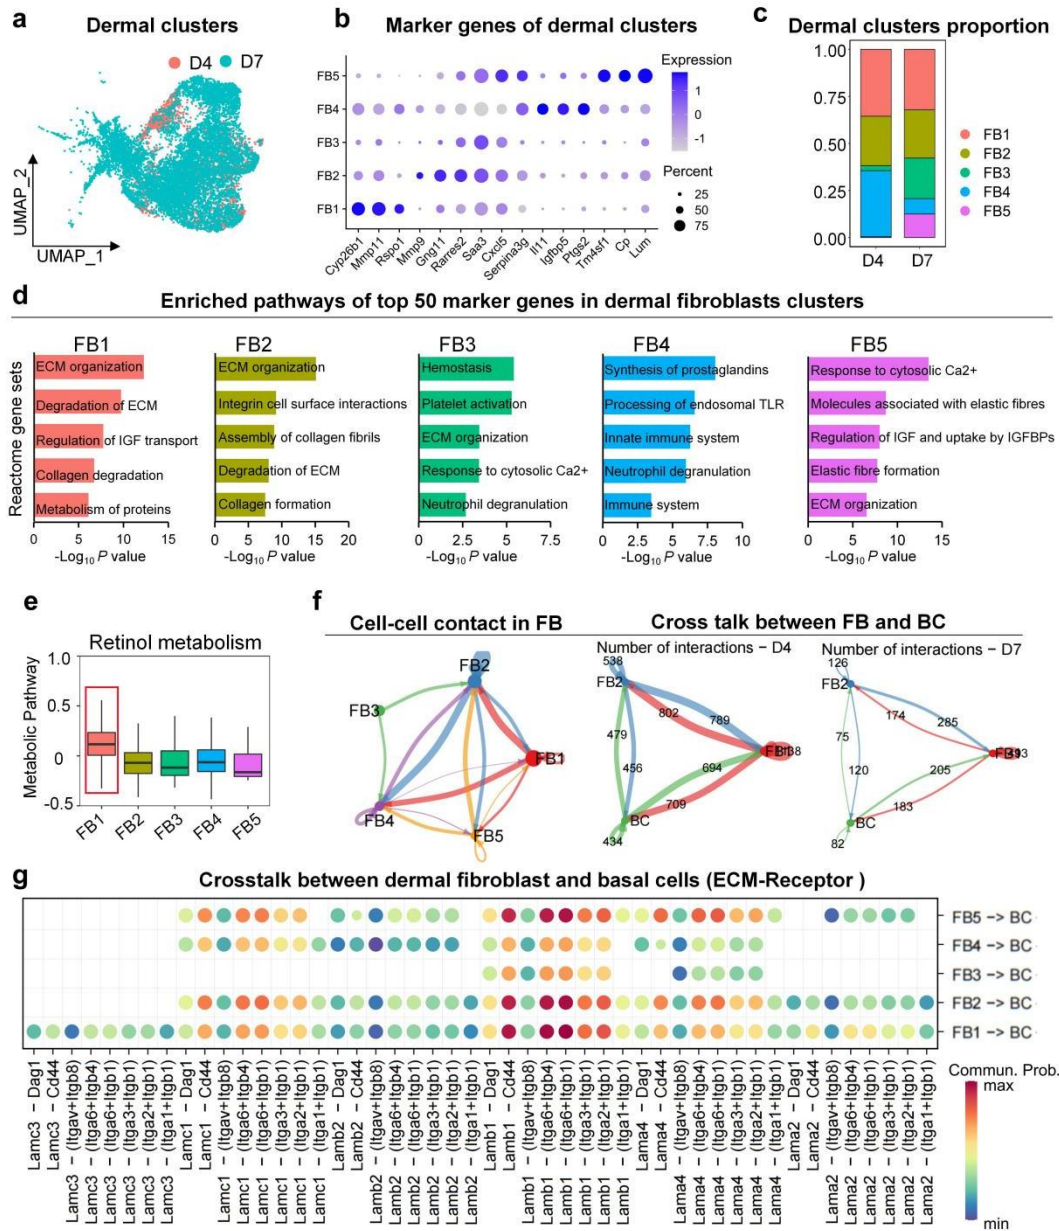

### **Extended Data Fig. 6: Metabolic heterogeneity in dermal fibroblasts**

- a. UMAP plots showing the dimensionality reduction and clustering of D4 and D7 dermal fibroblasts.
- b. Marker genes defining subpopulations of dermal fibroblasts in skin organ.
- c. Percentage comparison of cell numbers in five dermal fibroblast clusters.
- d. Reactome functional enrichment analysis of the top 50 marker genes identified in the sub-clusters of dermal fibroblasts.
- e. The comparative analysis of retinol metabolism intensity among FB1-5 clusters by scMeabolism.
- f. Left: Cellchat analysis demonstrating the interplay among the five dermal fibroblast clusters; Right: Cell communication analysis revealing the interaction between FB1 and FB2 with epidermal basal cells.
- g. Crosstalk between dermal fibroblast and basal cells (ECM-Receptor).

Extended Data Fig. 7

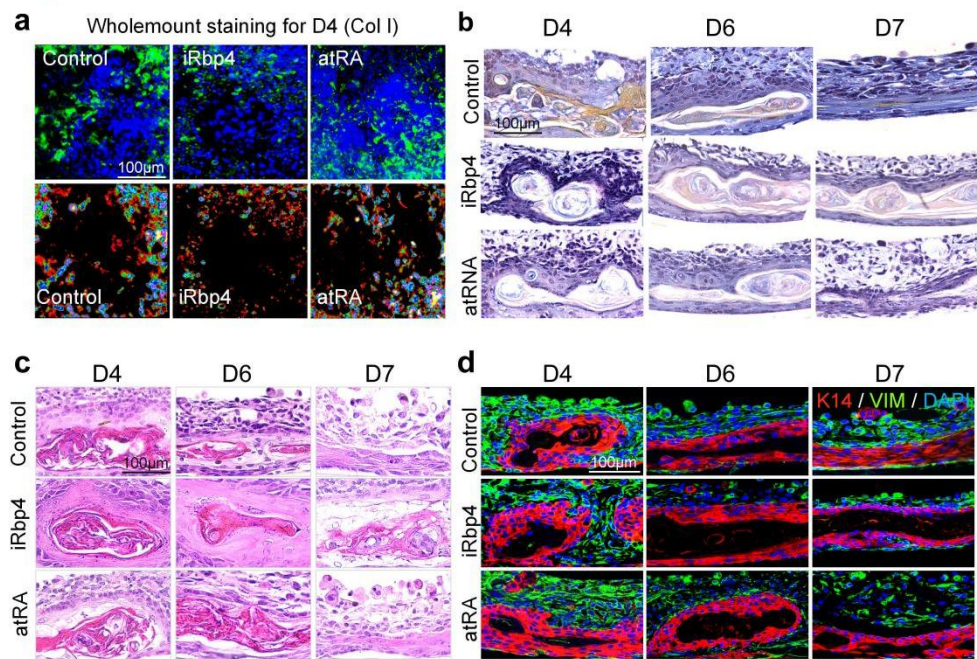



**Extended Data Fig. 7: Retinol metabolism supports self-organization of dermal fibroblasts and basal membrane formation**

- a. Three-dimensional whole tissue staining to compare the expression of Col I of the iRBP4 group and atRA group at D4.
- b. Herovici staining to compare collagen neogenesis and the expression of keratin in iRBP4 group and atRA groups at D4, D6, and D7.
- c. HE staining to compare the expression of keratin in iRBP4 and atRA group at D4, D6, and D7.
- d. Immunofluorescence double staining to observe the epidermal planarization process in the iRBP4 group and atRA groups at D4, D6, and D7.

## Supplementary Table

**Supplementary Table 1:** The antibody information used in immunostaining

| Antibody      | Company     | Cat #            |
|---------------|-------------|------------------|
| Bmp4          | Beyotime    | Cat # AF6312     |
| Collagen I    | Arigobio    | Cat # ARG21965   |
| Collagen III  | Proteintech | Cat # 22734-1-AP |
| Collagen VI   | Proteintech | Cat # 17023-1-AP |
| Collagen XVII | Beyotime    | Cat # AF1078     |
| Ctsl          | Bioss       | Cat # BS-1508R   |
| Ctsd          | Beyotime    | Cat # AF1645     |
| E-cadherin    | Beyotime    | Cat # AF0138     |
| Eno1          | Beyotime    | Cat # AF5162     |
| Fabp4         | ABclonal    | Cat # A0232      |
| Gpi           | Bioss       | Cat # BS-10419R  |
| HIF1A         | Elabscience | Cat # E-AB-31662 |
| KRT14         | Boster      | Cat # A01432     |
| KLK7          | Zenbio      | Cat # 384788     |
| Laminin       | Abcam       | Cat # ab11575    |
| Lamp1         | Beyotime    | Cat # AF7353     |
| Lamp2         | Bioss       | Cat # BS-2379R   |
| Ldha          | Affinity    | Cat # DF6280     |
| Mgp           | Proteintech | Cat # 10734-1-AP |
| P63           | GeneTex     | Cat # GTX102425  |
| P-Cadherin    | R&D         | Cat # AF761      |
| Pgam1         | Beyotime    | Cat # AG2856     |
| Pgk1          | Beyotime    | Cat # AF1825     |
| Pfkl          | Proteintech | Cat # 68385-1-Ig |
| DAPI          | Beyotime    | Cat # C1005      |
| Rbp4          | Proteintech | Cat # 11774-1-AP |
| SPP1          | Beyotime    | Cat # AF1651     |
| Tenascin C    | Beyotime    | Cat # AF1651     |
| Twist1        | Zenbio      | Cat # 507314     |
| Vimentin      | Beyotime    | Cat # AF0318     |

**Supplementary Table 2:** The information of chemicals and recombinant proteins

|                        | Company    | Cat #             |
|------------------------|------------|-------------------|
| KC7F2                  | MCE        | Cat # HY-P2230    |
| 2-DG                   | TargetMol  | Cat # T24167      |
| iENO1                  | TopSCIENCE | Cat # T0353       |
| iPGAM1                 | Beyotime   | Cat # ST1056      |
| Paraformaldehyde (PFA) | Servicebio | Cat # G1101       |
| Xylene                 | Chembk     | Cat # 128686-03-3 |

|                   |          |                 |
|-------------------|----------|-----------------|
| PBS               | Solarbio | Cat # P1010     |
| Anhydrous ethanol | LMAI Bio | Cat # LM64-17-5 |
| Trypsin           | Gibco    | Cat # R001100   |
| RIPA              | Beyotime | Cat # P0013B    |
| DMEM/F12          | Corning  | Cat # 10092018  |

**Supplementary Table 3:** The information of primer for qPCR

| Gene    | Forward                 | Reverse                  |
|---------|-------------------------|--------------------------|
| Abcg1   | CTTTCCTACTCTGTACCCGAGG  | CGGGGCATTCCATTGATAAGG    |
| Aldh3b1 | ATGGACTCGTTTGAAGACAAGC  | GATGGCAATCTCAGACACCTC    |
| Atp6ap1 | GGCGGCAACAGTGGTATCTC    | CACAGATTCCGGTCACTCGAC    |
| Ctsc    | CAACTGCACCTACCCTGATCT   | TAAAATGCCCGGAATTGCCCA    |
| Ctsd    | GCTTCCGGTCTTTGACAACCT   | CACCAAGCATTAGTTCTCCTCC   |
| Ctsl    | ATCAAACCTTTAGTGCAAGTGG  | CTGTATTCCCCGTTGTGTAGC    |
| Ctsz    | GGCCAGACTTGCTACCATCC    | ACACCGTTCACATTTCTCCAG    |
| Eno1    | TGCGTCCACTGGCATCTAC     | CAGAGCAGGCGCAATAGTTTTA   |
| Gpi1    | TCAAGCTGCGCGAACTTTTTG   | GGTTCTTGAGTAGTCCACCAG    |
| Gys1    | GAACGCAGTGCTTTTCGAGG    | CCAGATAGTAGTTGTCACCCCAT  |
| Hif1a   | ACCTTCATCGGAAACTCCAAAG  | CTGTTAGGCTGGGAAAAGTTAGG  |
| Hif2a   | CTGAGGAAGGAGAAATCCCGT   | TGTGTCCGAAGGAAGCTGATG    |
| Hk2     | TGATCGCCTGCTTATTCACGG   | AACCGCCTAGAAATCTCCAGA    |
| Hk3     | TGCTGCCCACATACGTGAG     | GCCTGTCAGTGTTACCCACAA    |
| Hmox1   | AAGCCGAGAATGCTGAGTTCA   | GCCGTGTAGATATGGTACAAGGA  |
| Hmox1   | AAGCCGAGAATGCTGAGTTCA   | GCCGTGTAGATATGGTACAAGGA  |
| Hsp90   | AATTGCCAGTTAATGTCCTTGA  | CGTCCGATGAATTGGAGATGAG   |
| Lamp1   | CAGCACTCTTTGAGGTGAAAAAC | ACGATCTGAGAACCATTTCGCA   |
| Lamp2   | TGTATTTGGCTAATGGCTCAGC  | TATGGGCACAAGGAAGTTGTC    |
| Ldha    | TGTCTCCAGCAAAGACTACTGT  | GACTGTACTTGACAATGTTGGGA  |
| Ldhb    | CATTGCGTCCGTTGCAGATG    | GGAGGAACAAGCTCCCGTG      |
| Pgk1    | ATGTCGCTTTCCAACAAGCTG   | GCTCCATTGTCCAAGCAGAAT    |
| Rara    | ATGTACGAGAGTGTGGAAGTCG  | ACAGGCCCGGTTCTGGTTA      |
| Rbp4    | AGTCAAGGAGAACTTCGACAAGG | CAGAAAACCTCAGCGATGATGTTG |
| Rraga   | CTCGGGCGCTGTTTTCTGA     | CATGGCTGTATTGGGCATCAC    |
| Rragc   | AGATGTCACCCAATGAGACTCT  | AGTCGTCCTGTGCATCAATGA    |
| Tgfa    | CACTCTGGGTACGTGGGTG     | CACAGGTGATAATGAGGACAGC   |
| Tpi1    | CCAGGAAGTTCTTCGTTGGGG   | CAAAGTCGATGTAAGCGGTGG    |
